# Supplementary material for: Organoids as a new model for improving regenerative medicine and cancer personalized therapy in renal diseases
Source: PubMed Central journal article supplement (PMC6393468; doi:10.1038/s41419-019-1453-0), 2019-02-27
Supplement: 41419_2019_1453_MOESM2_ESM.pdf [file 41419_2019_1453_MOESM2_ESM.pdf]

**Supplementary Table 1**

|                                     |                   |
|-------------------------------------|-------------------|
| <b>ADMEM F12</b>                    | Invitrogen        |
| <b>GFR Matrigel</b>                 | Corning           |
| <b>GlutaMax</b>                     | Invitrogen        |
| <b>N- acetyl-L-cysteine</b>         | Sigma-<br>Aldrich |
| <b>Primocin</b>                     | invivoGen         |
| <b>B27 Supplement</b>               | Invitrogen        |
| <b>Penicillin/streptomycin</b>      | Lonza             |
| <b>Human recombinant FGF 2</b>      | Peprotech         |
| <b>Human recombinant EGF</b>        | Peprotech         |
| <b>HEPES Buffer</b>                 | Sigma             |
| <b>Rho kinase inhibitor Y-27632</b> | Sellenckche<br>m  |
| <b>A83-01 inhibitor TGFbeta</b>     | Tocris            |

**Supplementary Table 2: Clinical features of the patients enrolled**

| <b>Sample</b> | <b>Sex</b> | <b>Diagnose</b> | <b>ISUP<br/>Grade</b> | <b>pT</b> | <b>pN</b> | <b>M</b> | <b>Stage</b> |
|---------------|------------|-----------------|-----------------------|-----------|-----------|----------|--------------|
| 1             | f          | ccRCC           | G2                    | T1b       | Nx        | M0       | 1            |
| 2             | f          | ccRCC           | G3                    | T3a       | Nx        | M1       | 4            |
| 3             | m          | ccRCC           | G2                    | T3a       | N0        | M1       | 4            |
| 4             | m          | ccRCC           | G3                    | T3b       | N2        | M1       | 4            |
| 5             | m          | ccRCC           | G3                    | T2a       | Nx        | M1       | 4            |
| 6             | m          | ccRCC           | G4                    | T3a       | Nx        | M0       | 3            |
| 7             | m          | ccRCC           | G4                    | T1b       | Nx        | M1       | 4            |
| 8             | f          | ccRCC           | G4                    | T3a       | Nx        | M1       | 4            |
| 9             | f          | ccRCC           | G3                    | T3a       | Nx        | M0       | 3            |
| 10            | m          | ccRCC           | G2                    | T1b       | Nx        | M0       | 1            |
| 11            | m          | ccRCC           | G3                    | T3a       | Nx        | M0       | 3            |
| 12            | m          | ccRCC           | G3                    | T2a       | Nx        | M0       | 2            |
| 13            | f          | ccRCC           | G3                    | T2a       | Nx        | M0       | 2            |
| 14            | f          | ccRCC           | G2                    | T1a       | Nx        | M0       | 1            |
| 15            | m          | ccRCC           | G2                    | T1b       | Nx        | M0       | 1            |

### Supplementary Table 3: Short Tandem Repeat Analysis

| Type:Tumor Samples             | D8S1179 | D21S11       | D7S820 | CSF1PO | D3S1358 | Th01  | D13S317 | D16S539 | D2S1338 | D19S433 | vWA   | TPOX | D18S51 | Amel | D5S818 | FGA   |
|--------------------------------|---------|--------------|--------|--------|---------|-------|---------|---------|---------|---------|-------|------|--------|------|--------|-------|
| Tissue 1                       | 15;15   | 29;31.2      | 11;12  | 10;10  | 17;18   | 6;9.3 | 10;11   | 12;13   | 18;20   | 13;15   | 17;17 | 8;8  | 17;17  | XY   | 11;12  | 20;21 |
| Organoid Culture 1             | 15;15   | 29;31.2      | 11;12  | 10;10  | 17;18   | 6;9.3 | 10;11   | 12;13   | 18;20   | 13;15   | 17;17 | 8;8  | 17;17  | XY   | 11;12  | 20;21 |
| Tissue 2                       | 15;16   | 29;31        | 8;10   | 10;12  | 15;16   | 29;31 | 8;10    | 10;12   | 17;25   | 12;15   | 15;17 | 8;11 | 12;17  | XX   | 9;11   | 21;25 |
| Organoid Culture 2             | 15;16   | 29;31        | 8;10   | 10;12  | 15;16   | 7;9   | 8;8     | 12;12   | 17;25   | 12;15   | 15;17 | 8;11 | 12;17  | XX   | 9;11   | 21;25 |
| Tissue 3                       | 9;13    | 30;30        | 8;8    | 12;12  | 16;16   | 7;7   | 10;10   | 11;13   | 23;23   | 13;13   | 15;17 | 8;8  | 14;14  | XX   | 11;11  | 21;25 |
| Organoid Culture 3             | 9;13    | 30;30        | 8;8    | 12;12  | 16;16   | 7;7   | 10;10   | 11;13   | 23;23   | 13;13   | 15;17 | 8;8  | 14;14  | XX   | 11;11  | 21;25 |
|                                |         |              |        |        |         |       |         |         |         |         |       |      |        |      |        |       |
| Type: Normal and Tumor Samples | D8S1179 | D21S11       | D7S820 | CSF1PO | D3S1358 | Th01  | D13S317 | D16S539 | D2S1338 | D19S433 | vWA   | TPOX | D18S51 | Amel | D5S818 | FGA   |
| Tumor Tissue 4                 | 12;13   | 30;31.2;32.2 | 8;11   | 11;12  | 15;18   | 9;10  | 9;12    | 11;13   | 18;23   | 14;14   | 17;18 | 8;10 | 12;14  | XX   | 10;11  | 20;25 |
| Tumor Organoid Culture 4       | 12;13   | 30;31.2;32.2 | 8;11   | 11;12  | 15;18   | 9;10  | 9;12    | 11;13   | 18;23   | 14;14   | 17;18 | 8;10 | 12;14  | XX   | 10;11  | 20;25 |
| Normal Tissue 4                | 12;13   | 30;32.2      | 8;11   | 11;12  | 15;18   | 9;10  | 9;12    | 11;13   | 18;23   | 14;14   | 17;18 | 8;10 | 12;14  | XX   | 10;11  | 20;25 |
| Normal Organoid Culture 4      | 12;13   | 30;32.2      | 8;11   | 11;12  | 15;18   | 9;10  | 9;12    | 11;13   | 18;23   | 14;14   | 17;18 | 8;10 | 12;14  | XX   | 10;11  | 20;25 |
| Tumor Tissue 5                 | 14;15   | 29;32.2      | 8;9    | 11;12  | 15;17   | 6;8   | 9;11    | 11;11   | 18;18   | 15;16.2 | 17;17 | 8;9  | 12;13  | XY   | 12;13  | 23;26 |
| Tumor Organoid Culture 5       | 14;15   | 29;32.2      | 8;9    | 11;12  | 15;17   | 6;8   | 9;11    | 11;11   | 18;18   | 15;16.2 | 17;17 | 8;9  | 12;13  | XY   | 12;13  | 23;26 |
| Normal Tissue 6                | 14;15   | 29;32.2      | 8;9    | 11;12  | 15;17   | 6;8   | 9;11    | 11;11   | 18;18   | 15;16.2 | 17;17 | 8;9  | 12;13  | XY   | 12;13  | 23;26 |
| Normal Organoid Culture 6      | 14;15   | 29;32.2      | 8;9    | 11;12  | 15;17   | 6;8   | 9;11    | 11;11   | 18;18   | 15;16.2 | 17;17 | 8;9  | 12;13  | XY   | 12;13  | 23;26 |

### Supplementary Table 4: Gene Allele frequency and multiclonal variant representation

| Allele FeQ | Shared with Normal Tissue<br>(Number of analyzed genes) | Only normal Organoid<br>(Number of analyzed genes) |
|------------|---------------------------------------------------------|----------------------------------------------------|
| 0/0        | 195                                                     | 297                                                |
| 0/1        | 9849                                                    | 288                                                |
| 1/1        | 5294                                                    | 126                                                |

**Supplementary Table 5: Clinical features frozen samples**

| Sample | Sex | Diagnose | Grade            | pT                 | pN | M  | Stage |
|--------|-----|----------|------------------|--------------------|----|----|-------|
| 1      | f   | ccRCC    | G2               | T3a                | Nx | M0 | 3     |
| 2      | m   | ccRCC    | G3               | T3a                | N0 | M0 | 3     |
| 3      | m   | ccRCC    | G4               | T1b                | Nx | M0 | 1     |
| 4      | f   | ccRCC    | G3               | T3a                | N0 | M0 | 3     |
| 5      | m   | ccRCC    | G4               | T4                 | N0 | M0 | 4     |
| 6      | m   | ccRCC    | G4               | T3a                | N2 | M1 | 4     |
| 7      | m   | ccRCC    | G4 left/G3 right | T3a left/T1a right | N0 | M1 | 4     |
| 8      | m   | ccRCC    | G4               | T3a                | N0 | M0 | 3     |

**Supplementary Table 6: Cancer organoid implanted in immunocompromized mice**

| Sample | Sex | Diagnose | Grade | pT  | pN | M  | Stage | Kidney | Recurrence | Tumorgraft |
|--------|-----|----------|-------|-----|----|----|-------|--------|------------|------------|
| 1      | f   | ccRCC    | G3    | T3a | Nx | M1 | 4     | right  | YES        | YES        |
| 2      | m   | ccRCC    | G4    | T3a | Nx | M0 | 3     | left   | YES        | YES        |
| 3      | m   | ccRCC    | G4    | T3a | N2 | M1 | 4     | right  | N/A        | YES        |
| 4      | m   | ccRCC    | G4    | T3a | N0 | M0 | 3     | left   | NO         | NO         |
