# Supplementary material for: Organoids as a new model for improving regenerative medicine and cancer personalized therapy in renal diseases
Source: PubMed Central journal article supplement (PMC6393468; doi:10.1038/s41419-019-1453-0), 2019-02-27

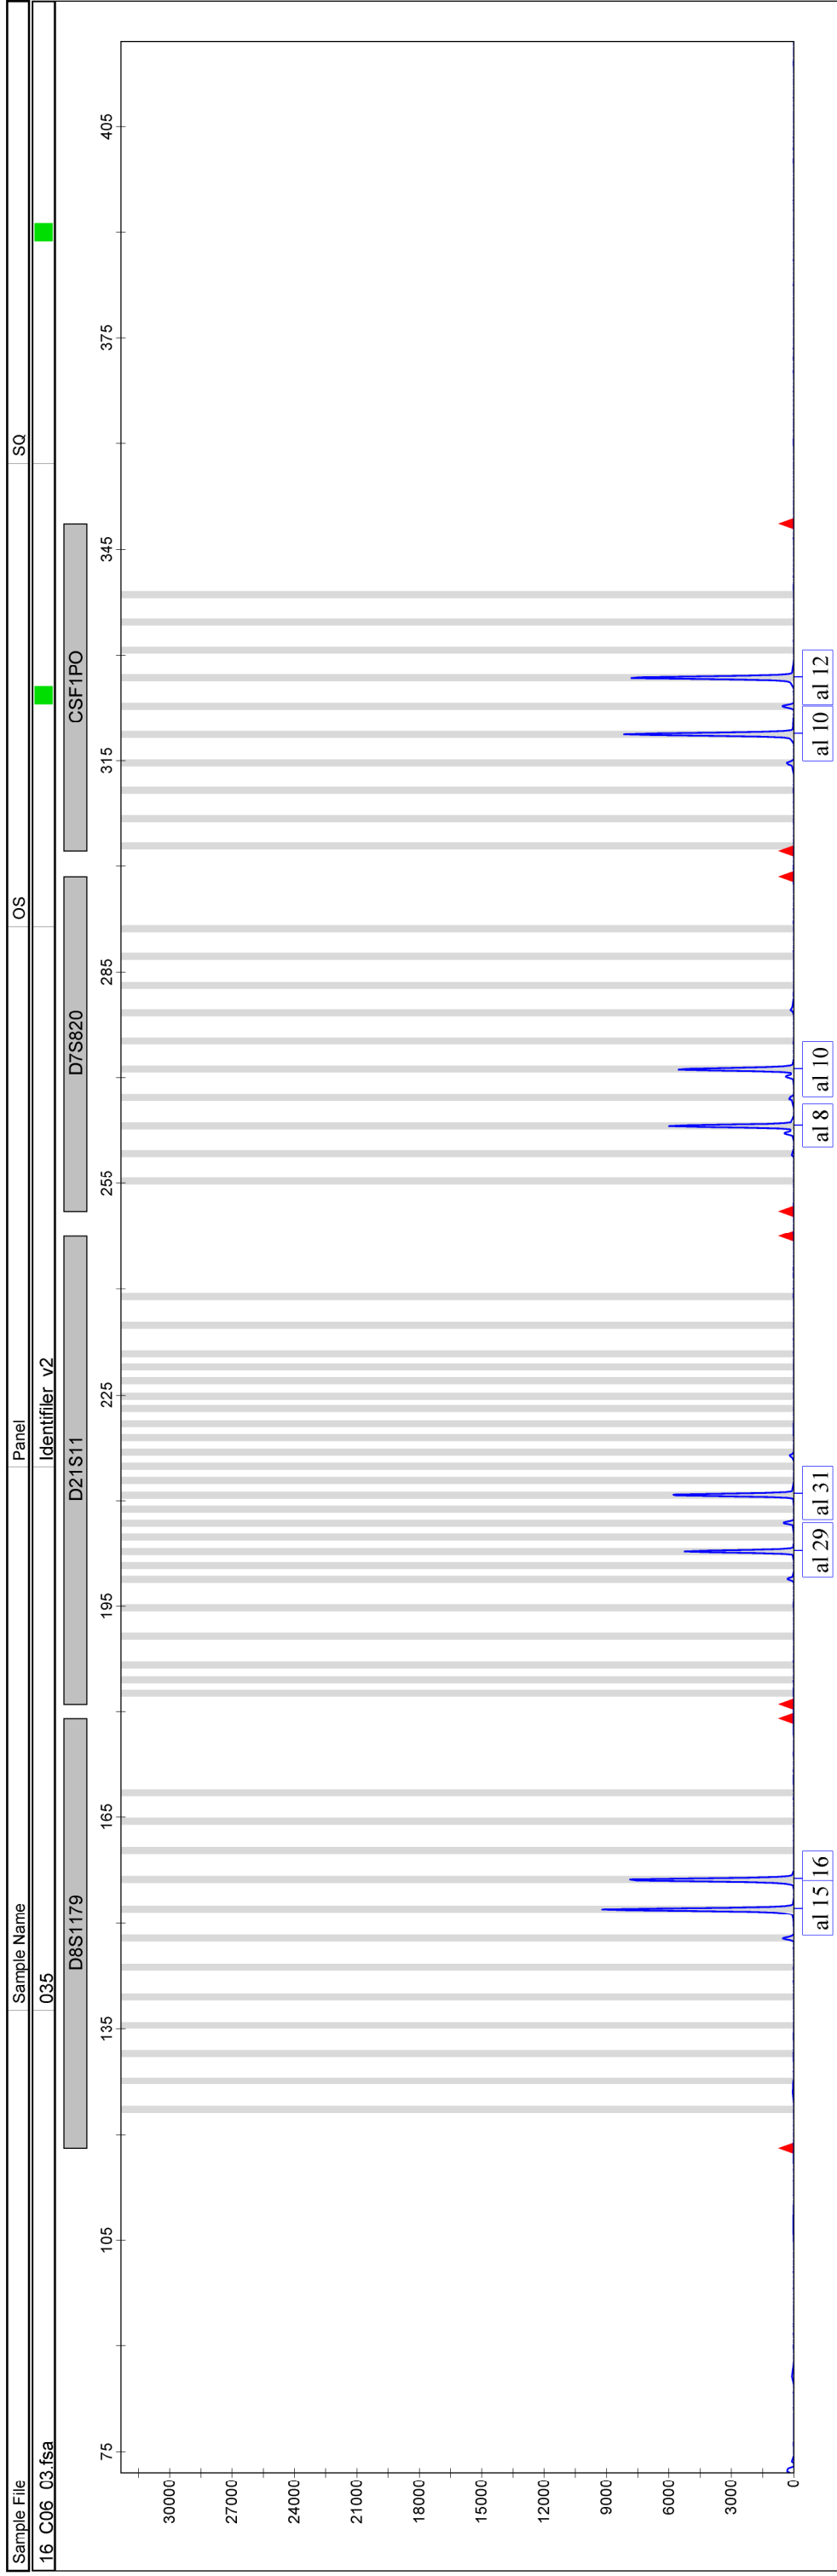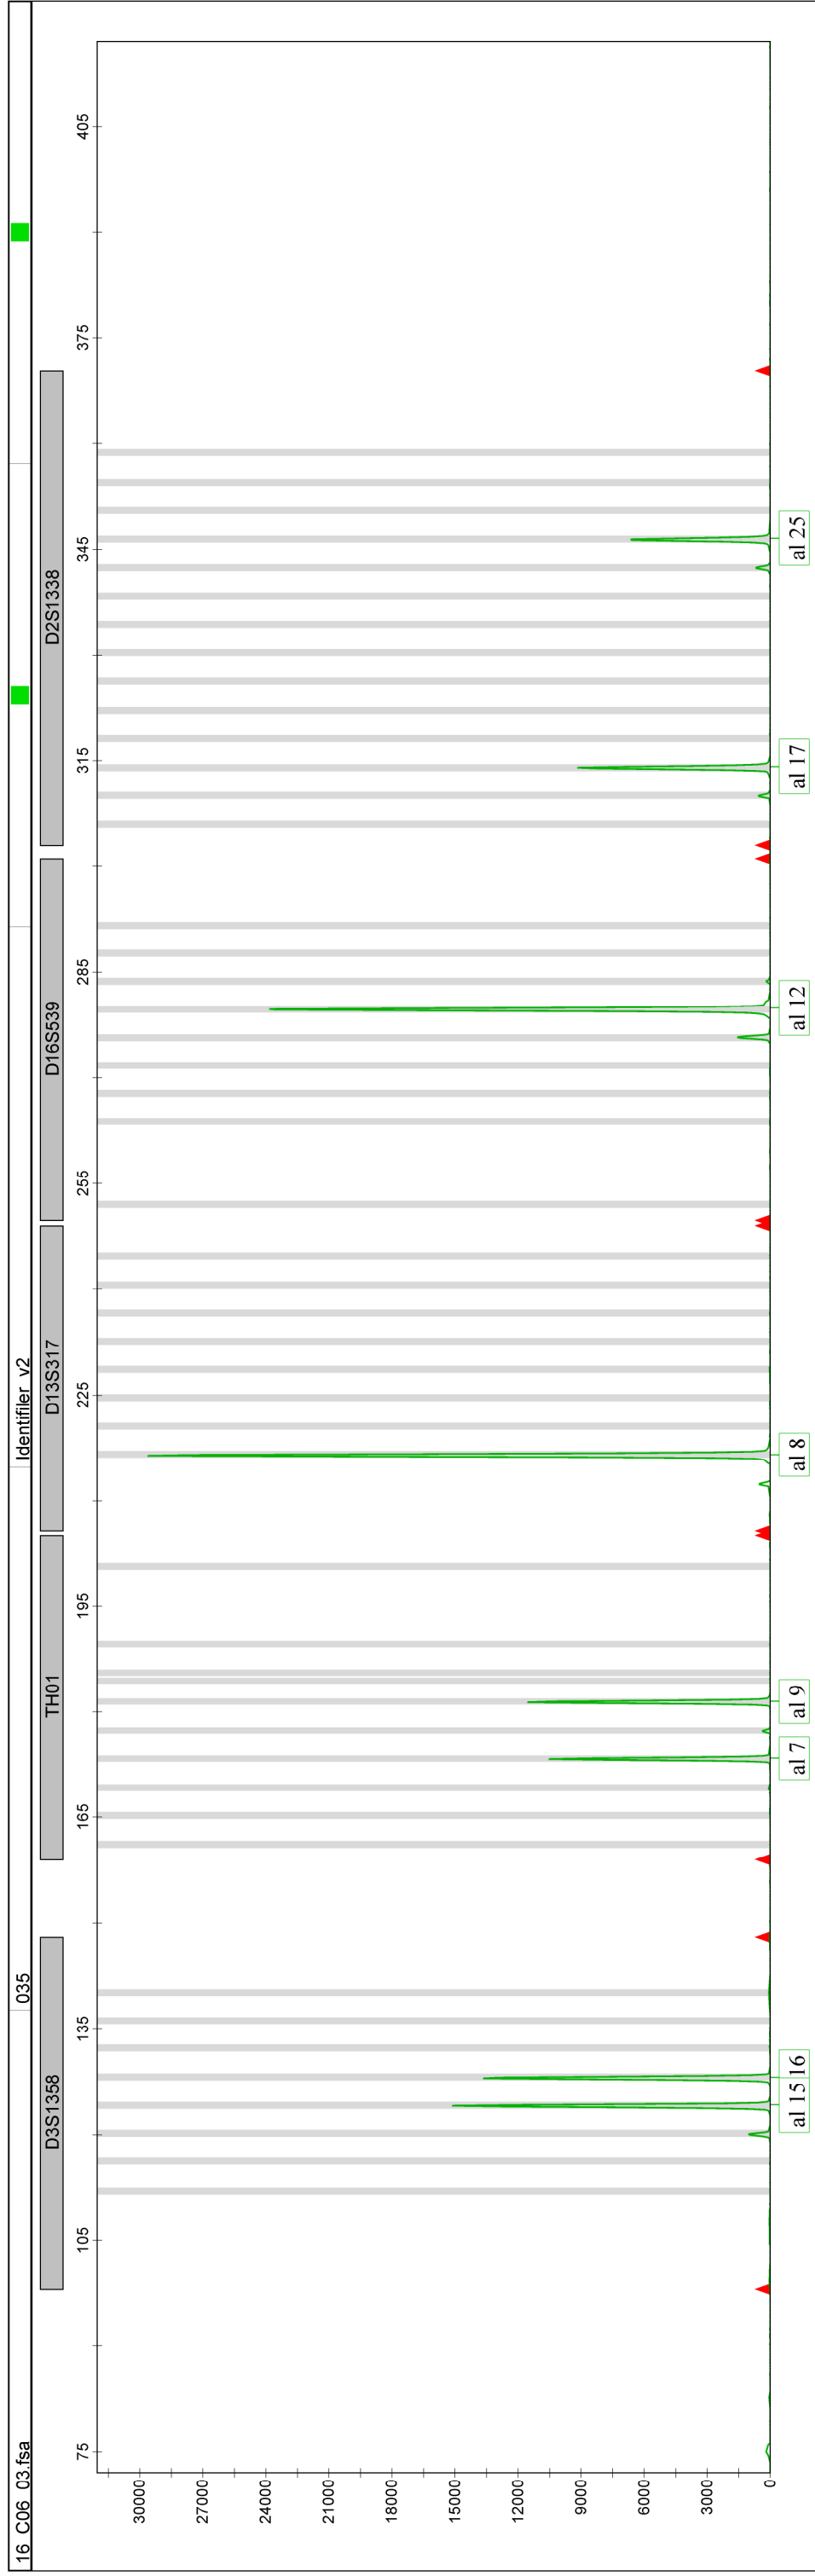

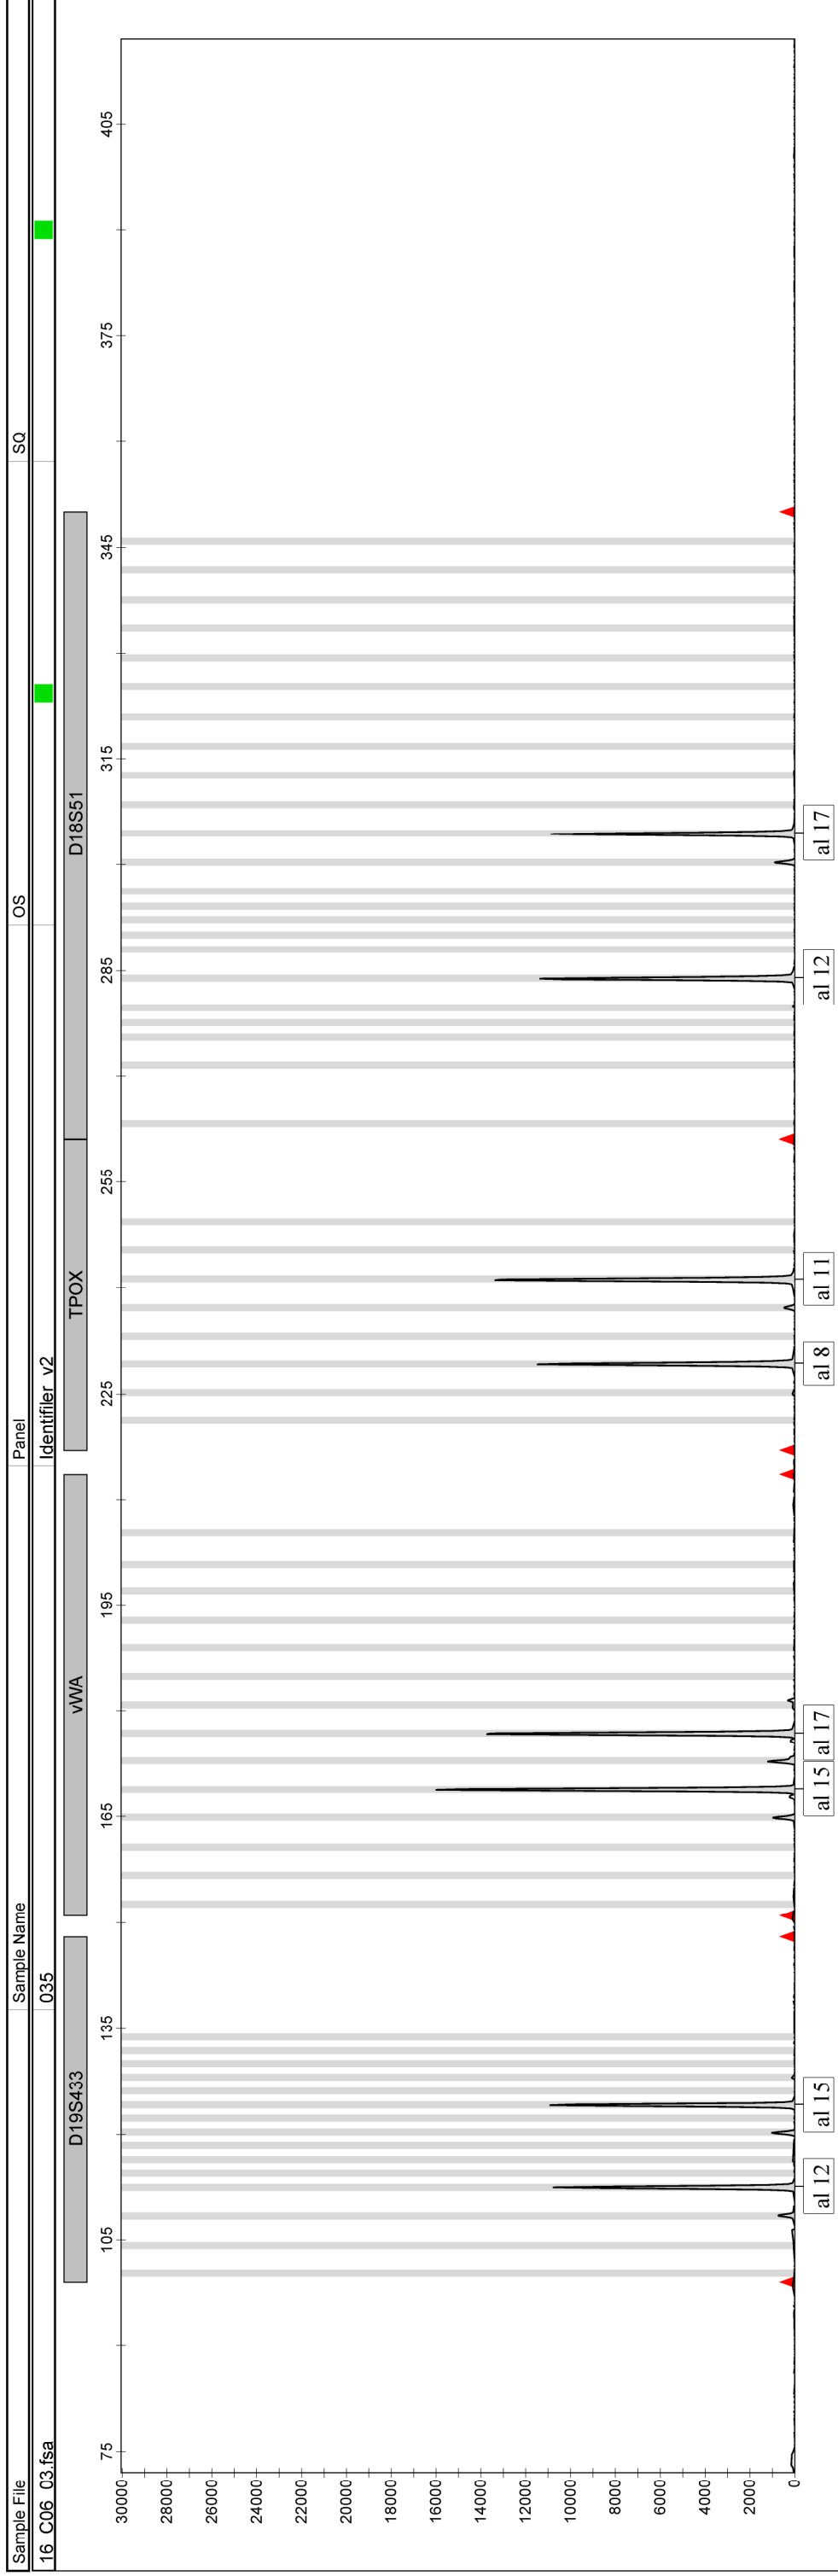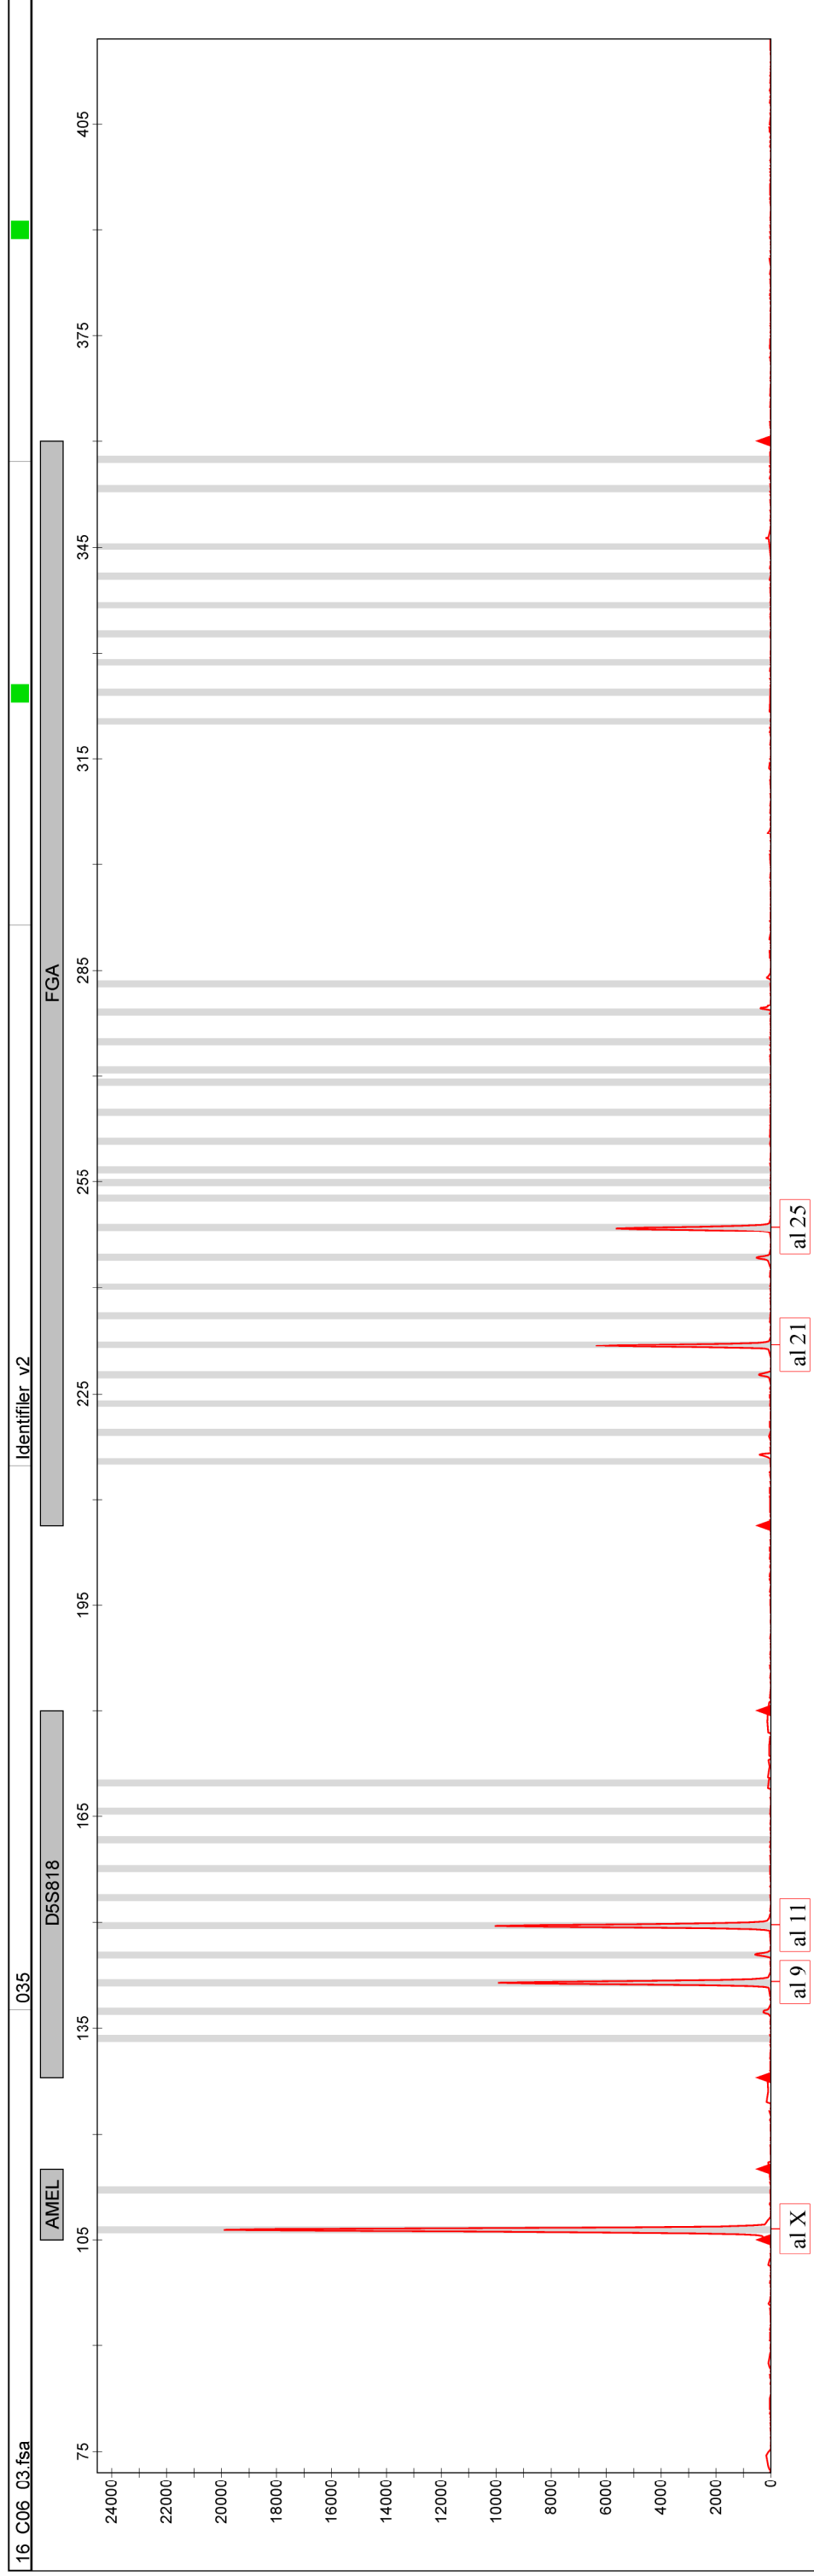

|               |             |               |    |    |
|---------------|-------------|---------------|----|----|
| Sample File   | Sample Name | Panel         | OS | SQ |
| 16_C06_03.fsa | 035         | Identifier_v2 |    |    |

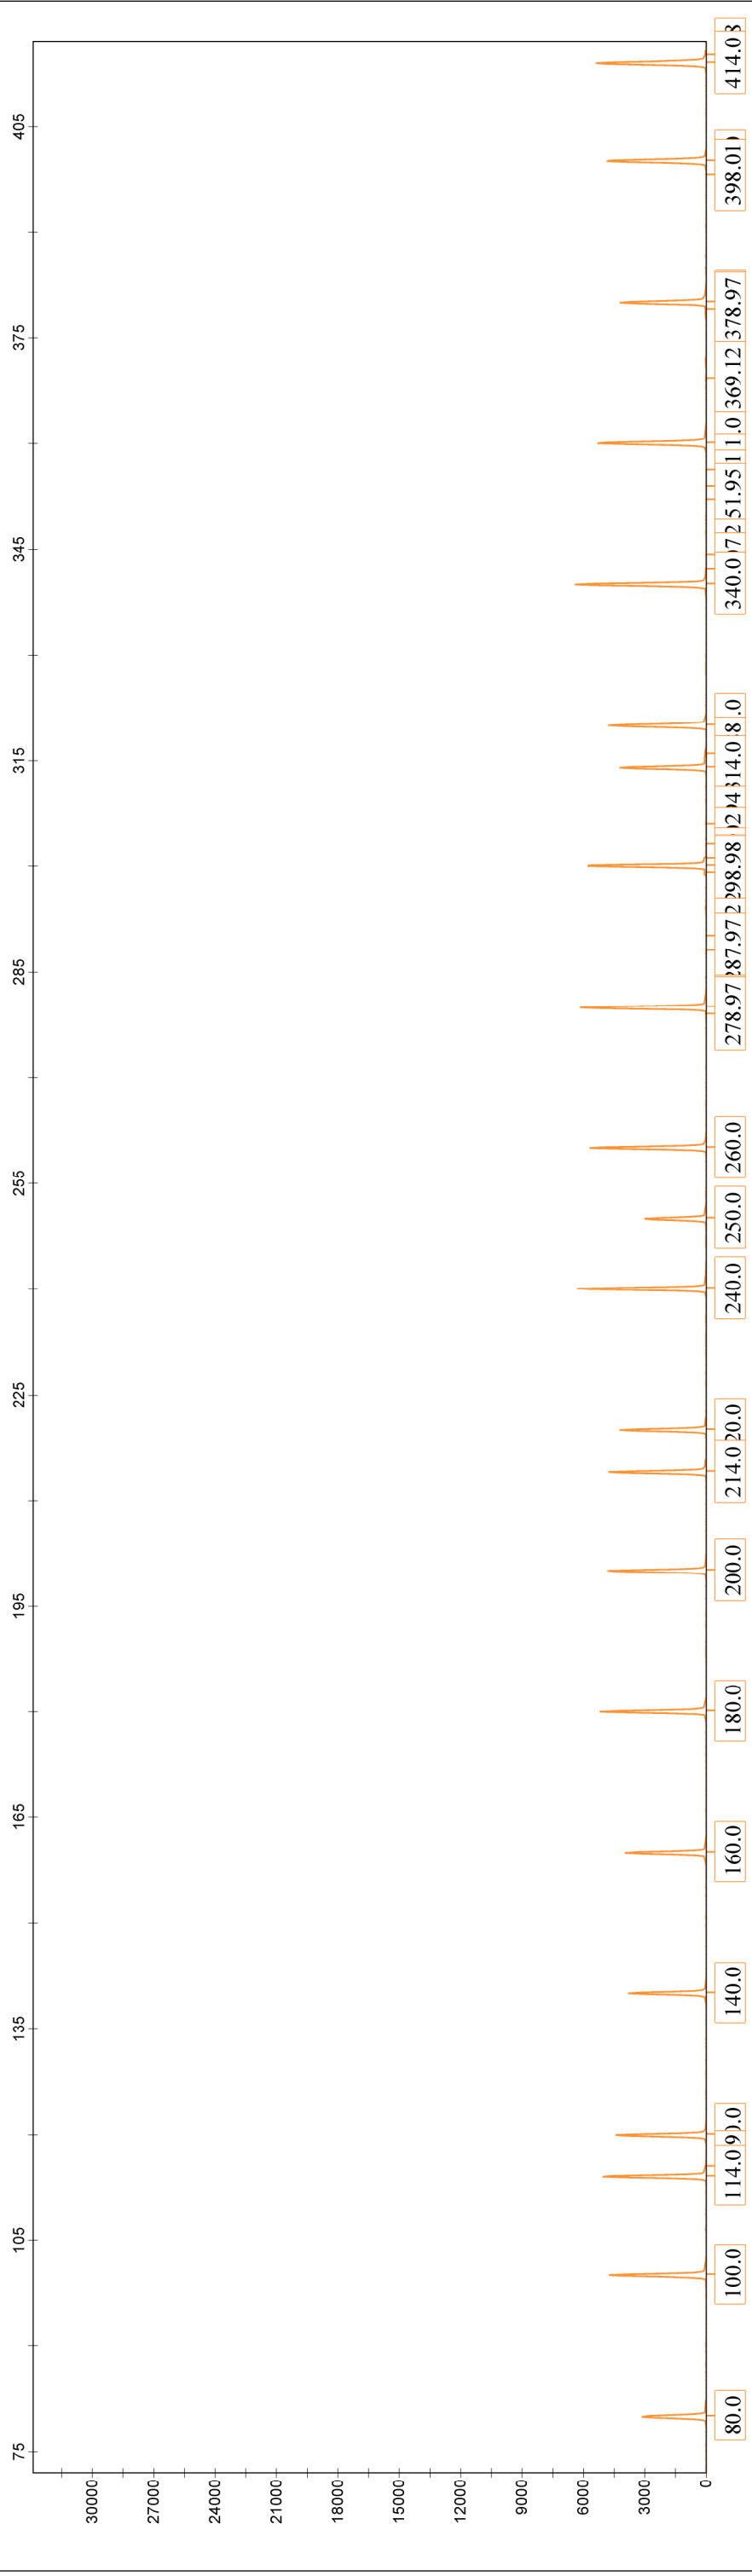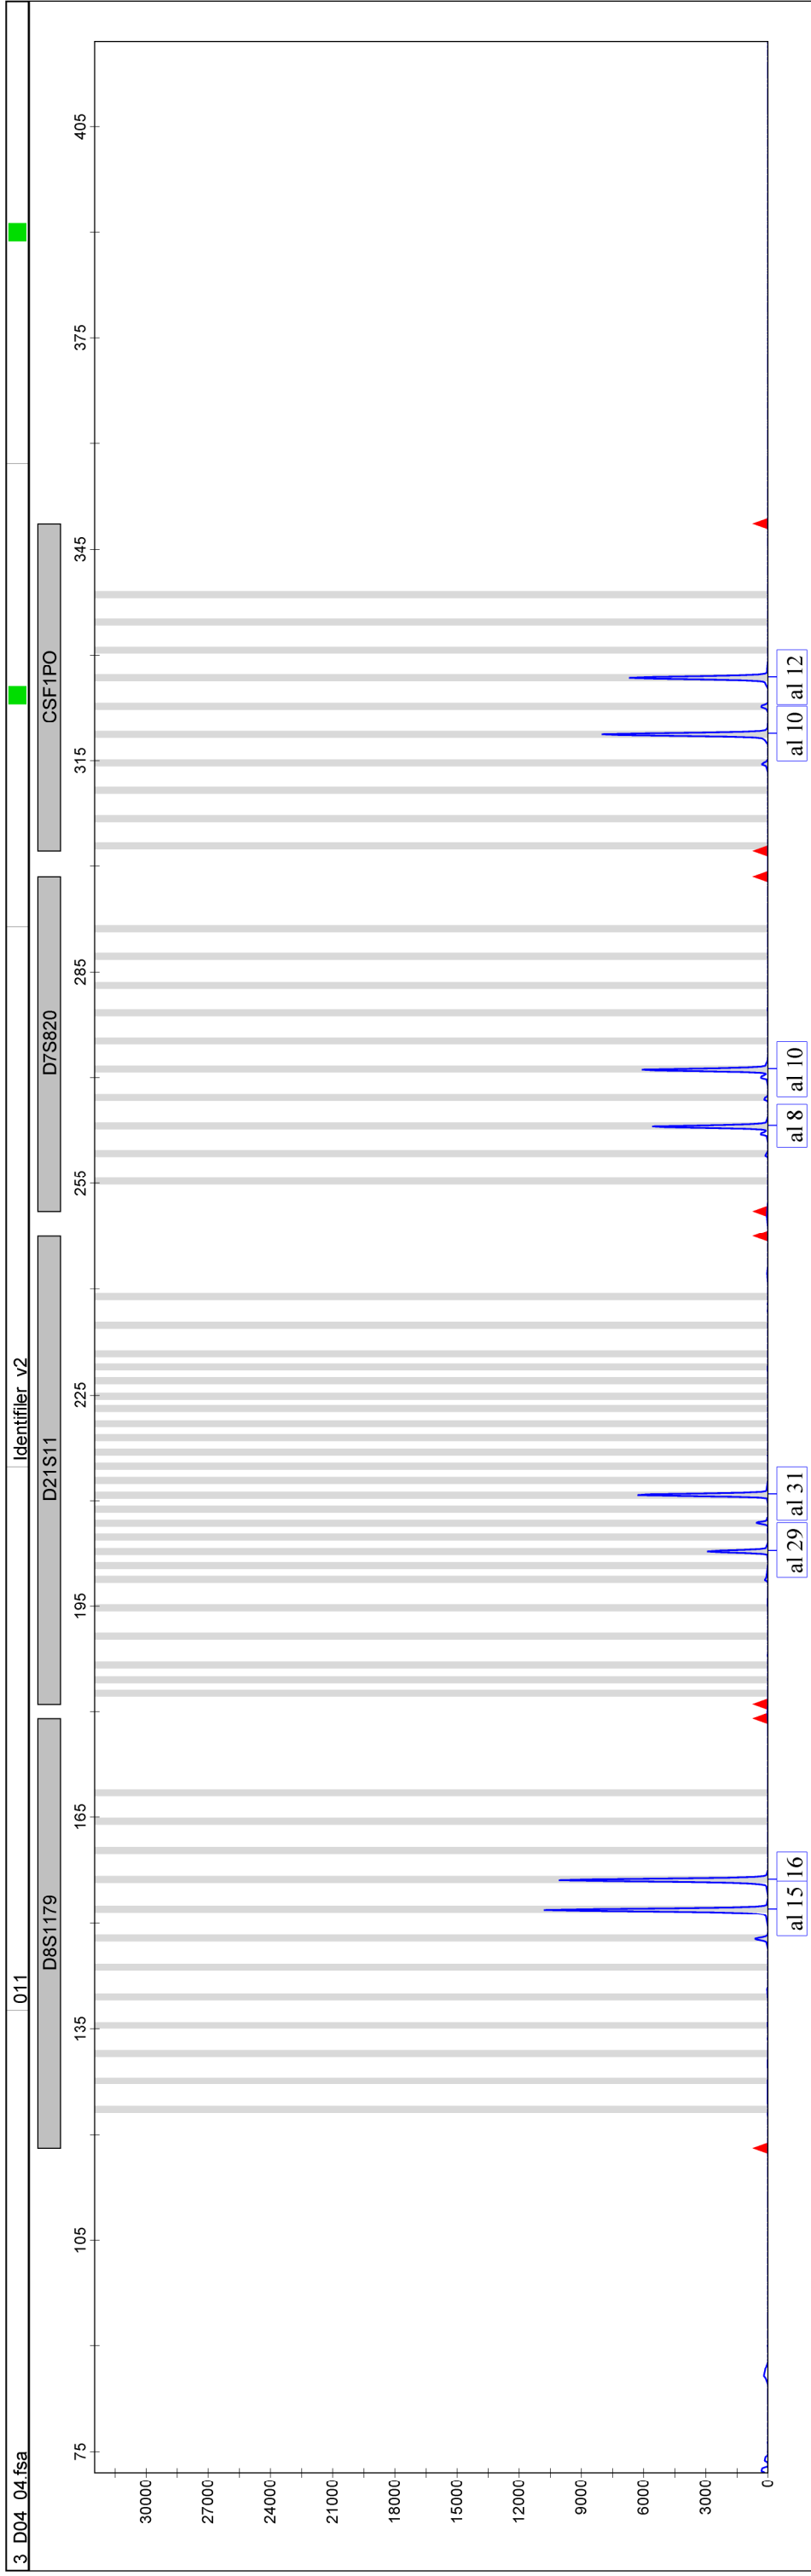

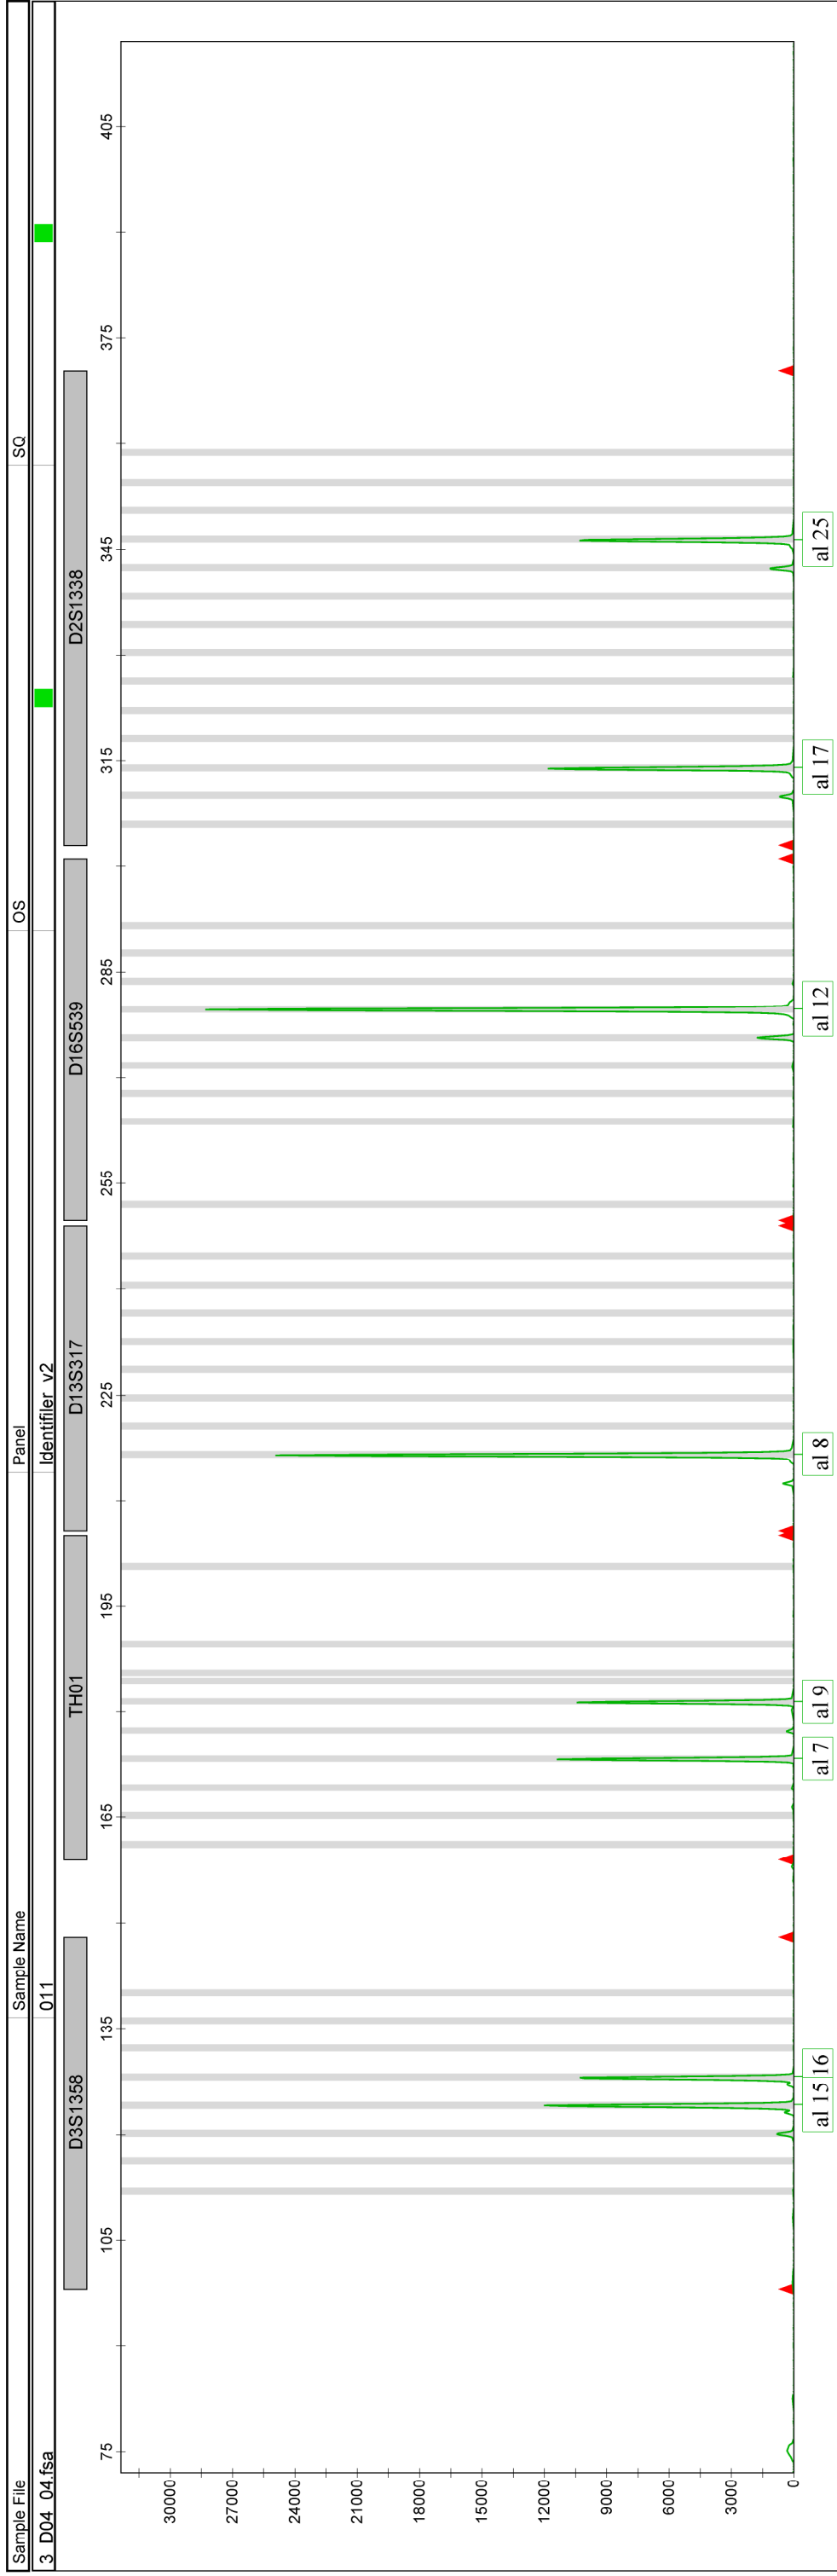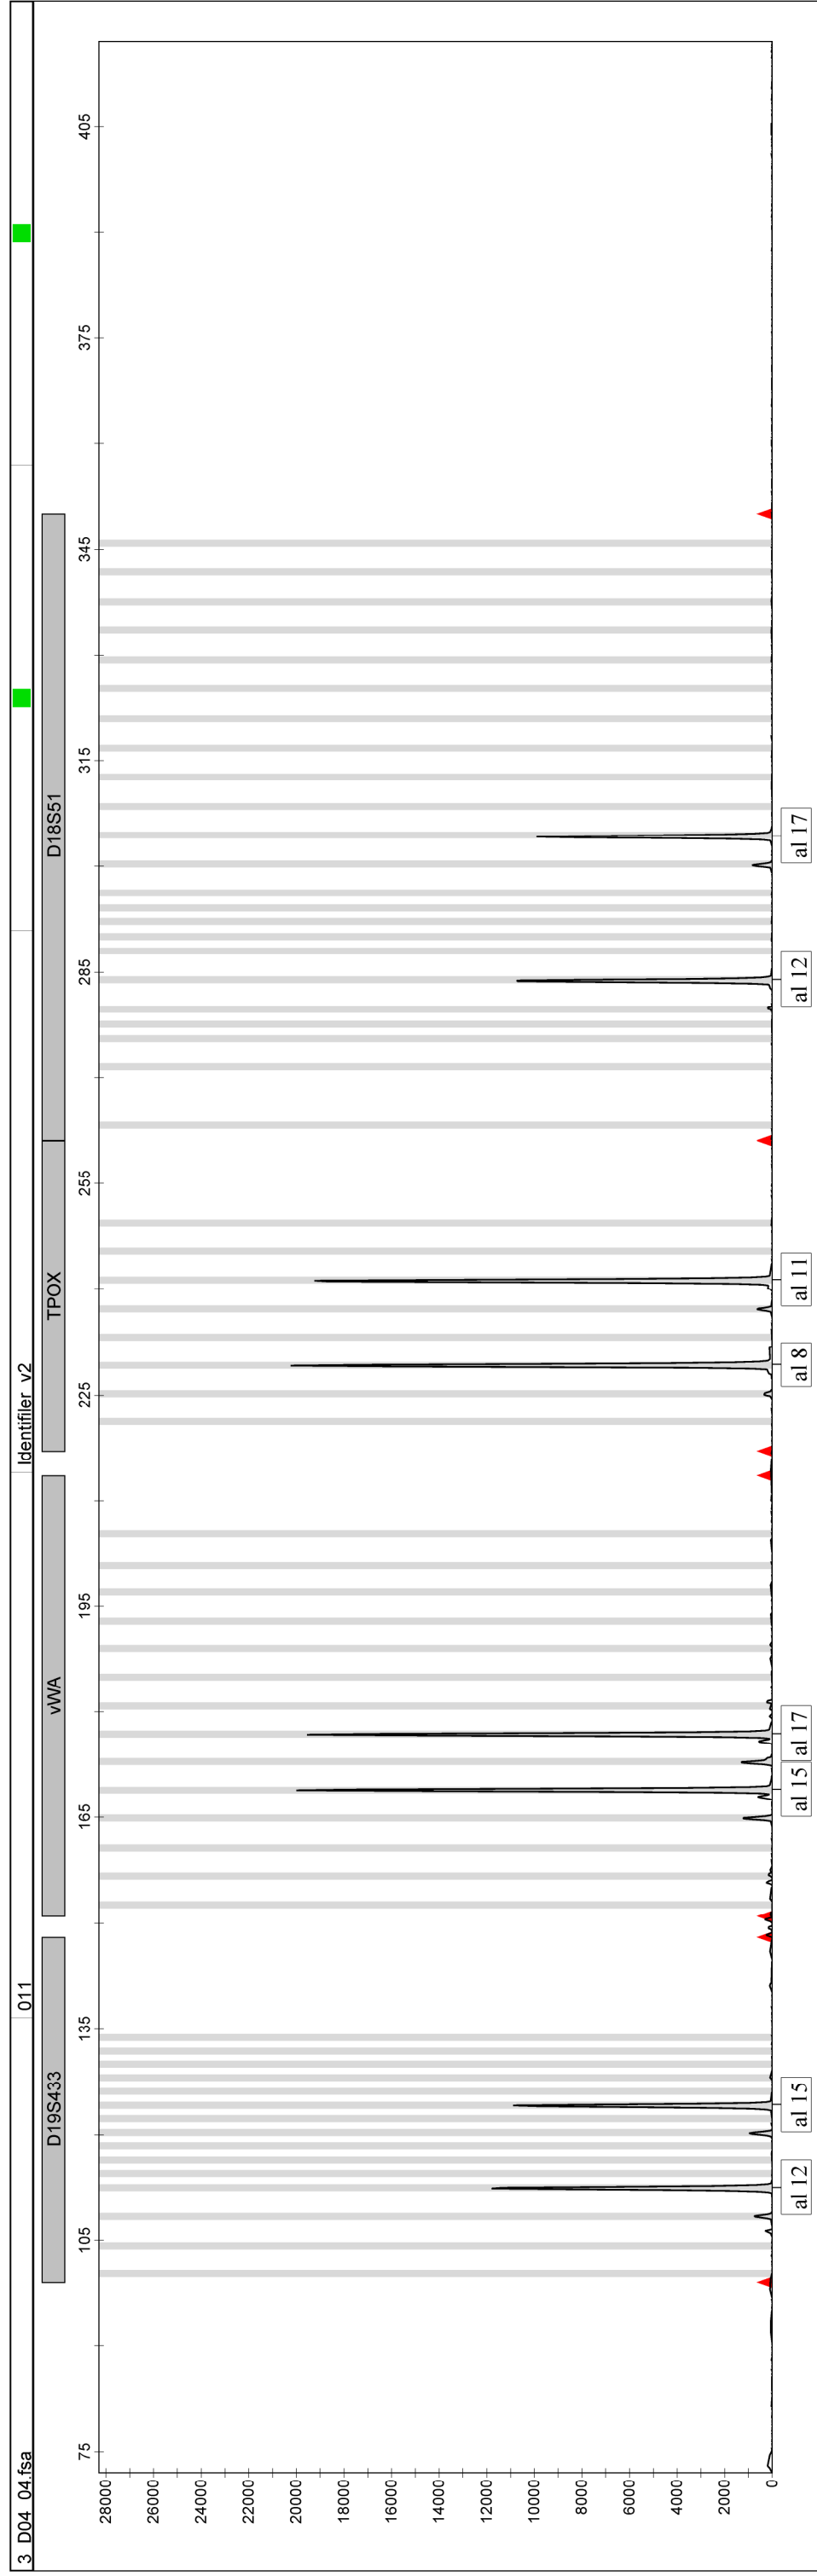

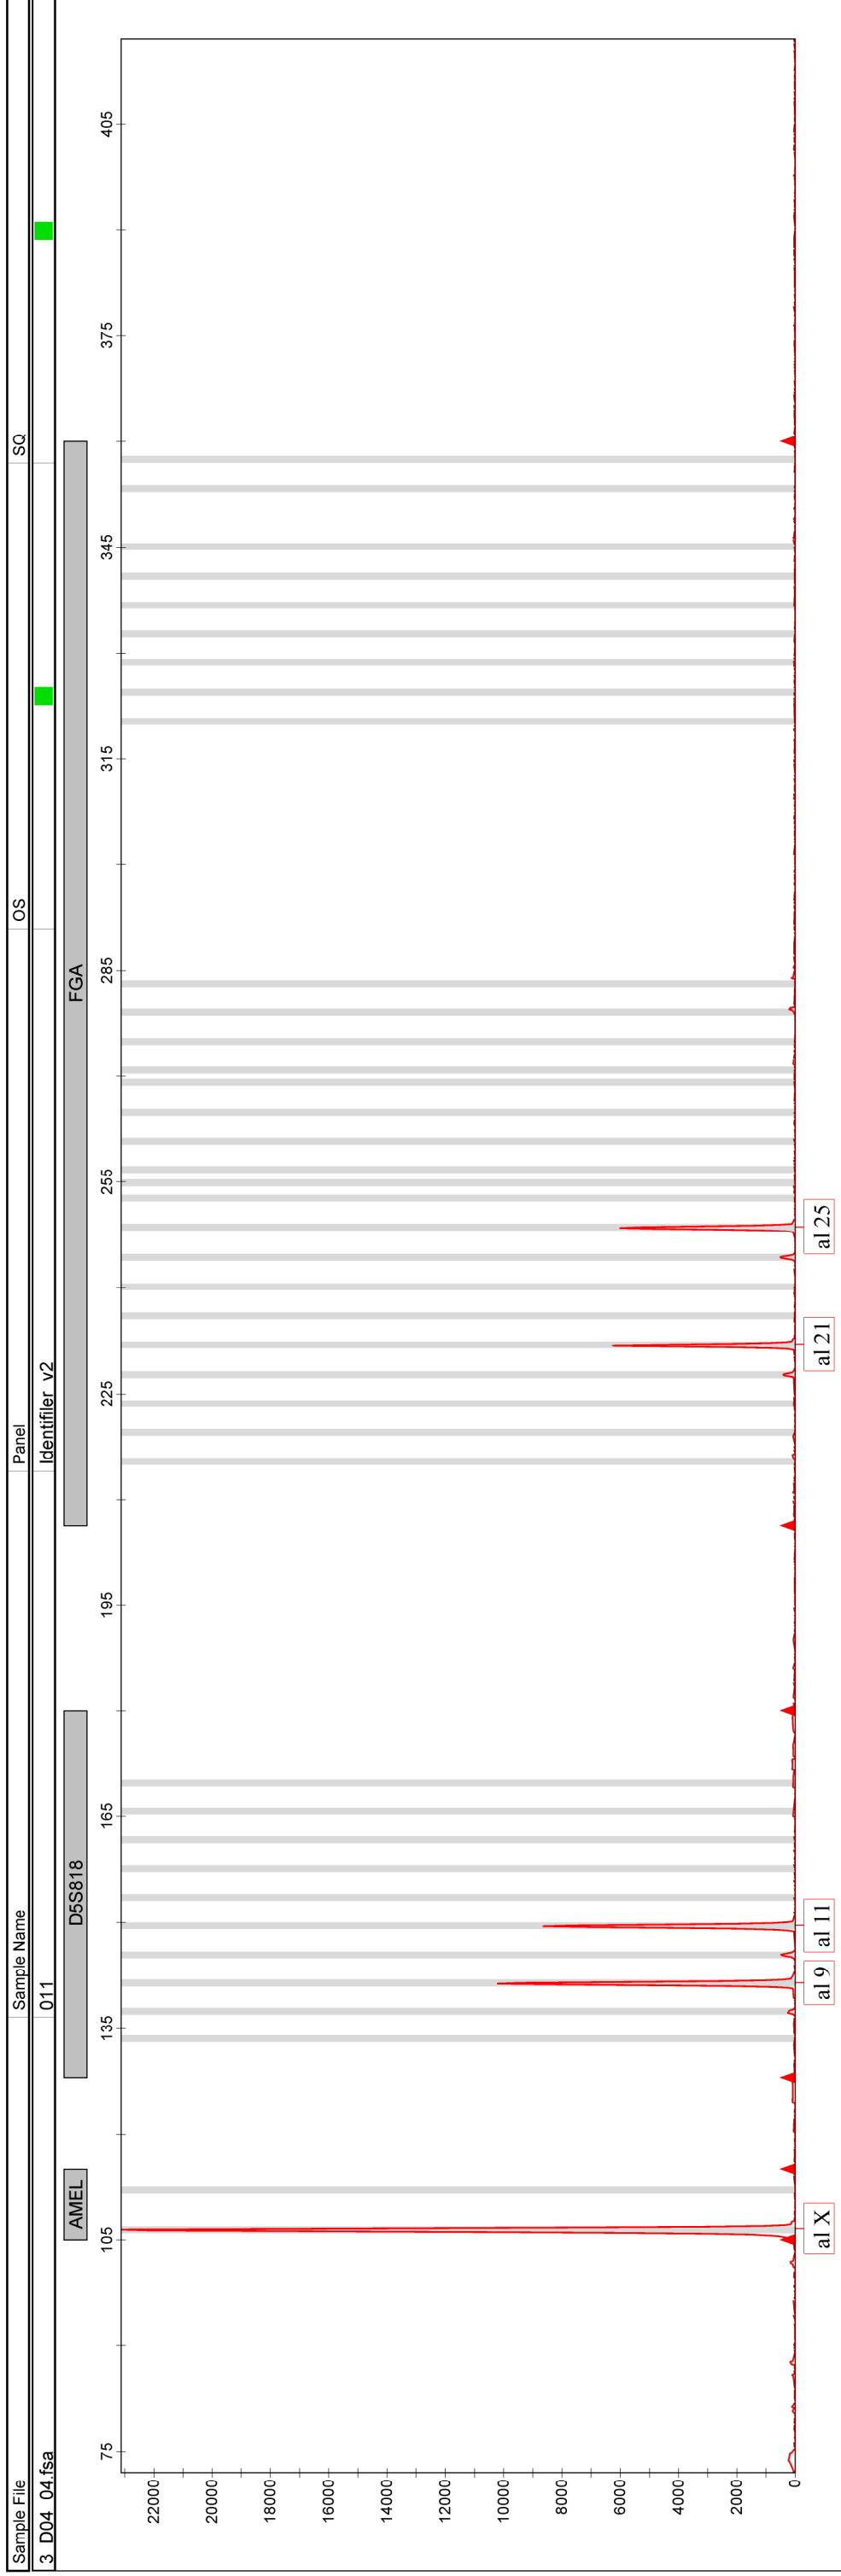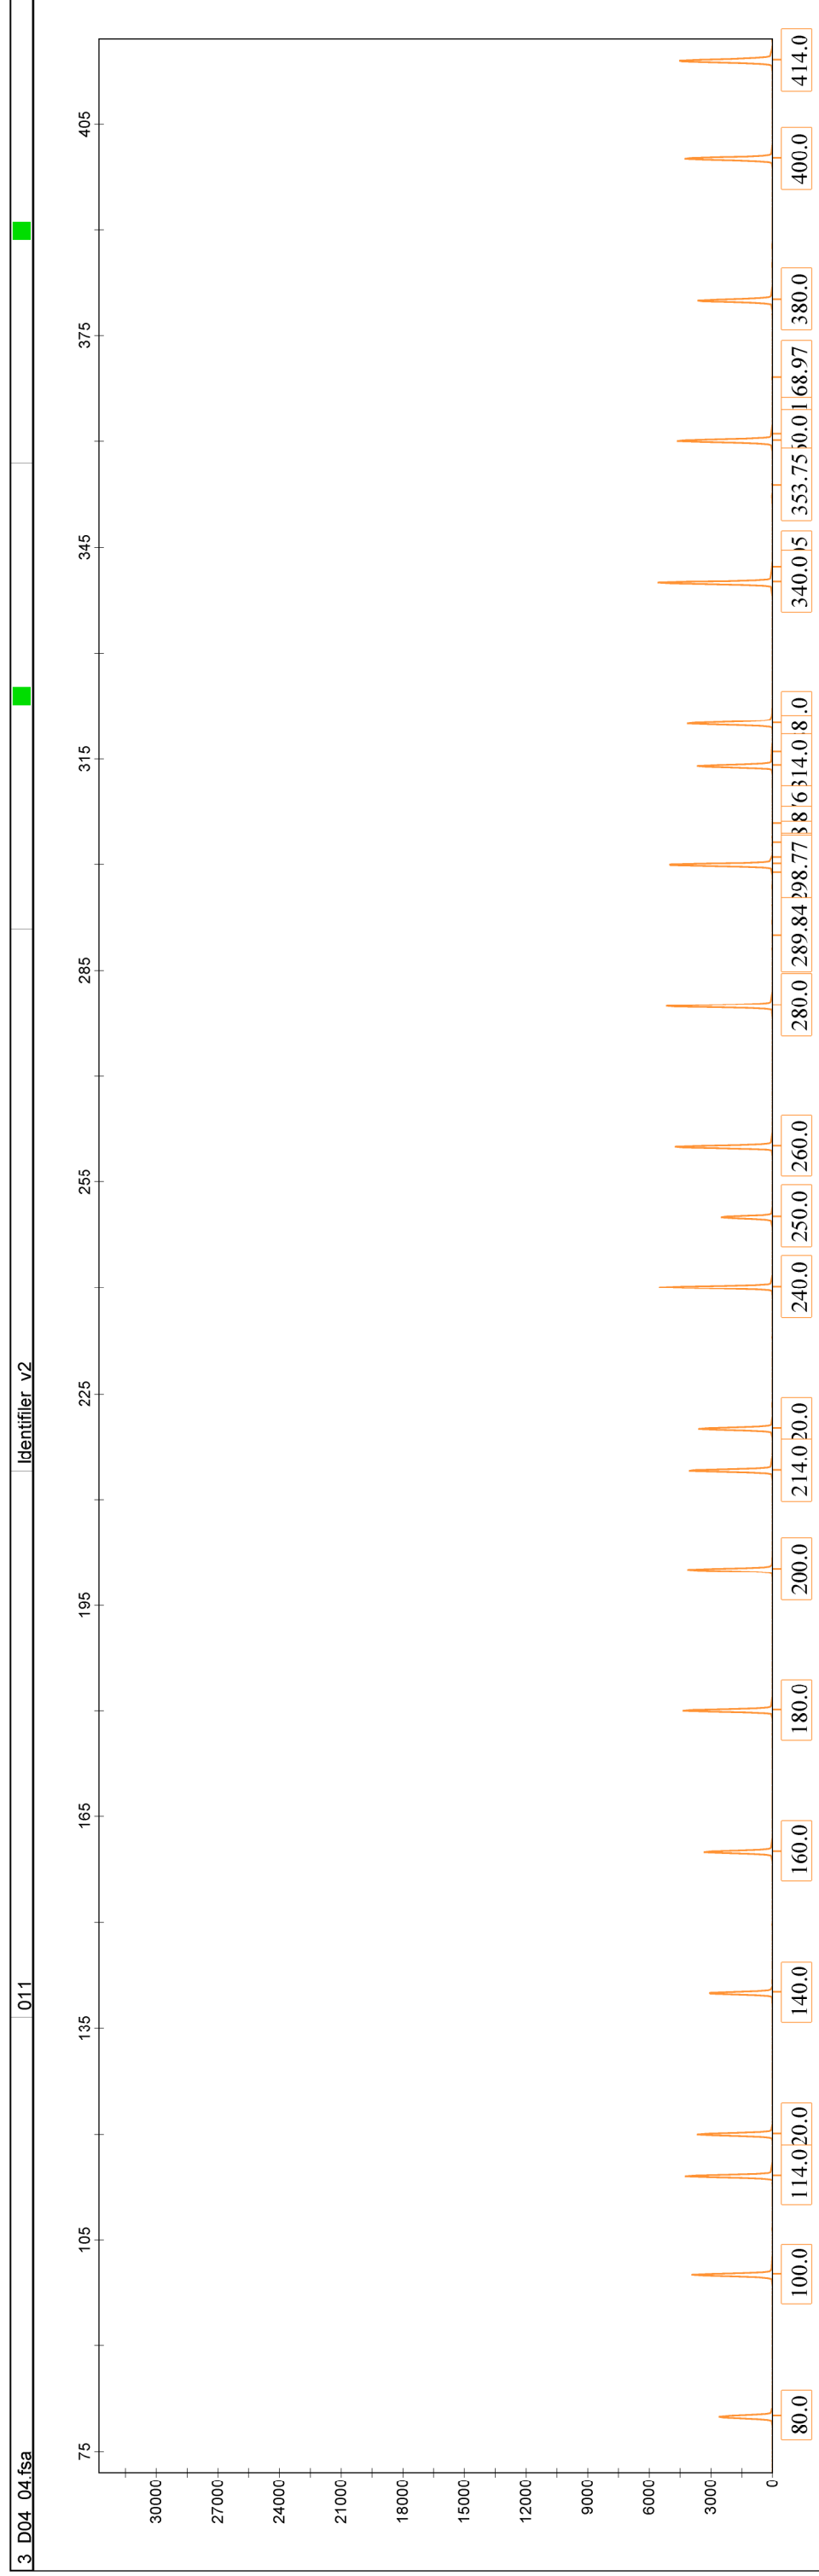

Supplement: 41419_2019_1453_MOESM25_ESM.pdf [file 41419_2019_1453_MOESM25_ESM.pdf]
